# Supplementary material for: Trueness and precision of complete denture digital impression compared to conventional impression: an in vitro study
Source: PeerJ. 2025 Feb 26;13:e19075. doi: 10.7717/peerj.19075 (PMC11871899; doi:10.7717/peerj.19075)
Supplement: Supplemental Information 1 [file peerj-13-19075-s001.xlsx]

## Sheet: Truness
Impression Technique	Sample	3D Ridge (RMS)	3D Palate (RMS)	3D Vestibule (RMS)	3D Overall (RMS)
VPS	1	31.6	23.2	47.5	33.2		(µm)
VPS	2	22.2	26	40.3	27.1		1000
VPS	3	46.9	50	50.8	48.3
VPS	4	17.6	17.7	30.2	20.7
VPS	5	34.6	28.9	55.5	35.7
VPS	6	55.9	55.5	50.7	54.9
VPS	7	30.1	31.2	51	34.7
VPS	8	41.8	23.9	49.7	39.3
VPS	9	40.7	35	58.8	41.7
VPS	10	41.5	32.7	57.6	42
VPS	11	57.2	58.3	53.9	57
Trios	1	39.6	50.6	35.9	41.1
Trios	2	38.3	36.8	33	36.9
Trios	3	30.6	46.4	33.6	35.1
Trios	4	37.8	51.4	40.2	41.4
Trios	5	23	37.2	29.9	28.1
Trios	6	35.8	40.8	39	37.6
Trios	7	25.3	35.5	33	29.6
Trios	8	33.1	47.7	38.9	37.8
Trios	9	26.4	31.8	30.7	28.6
Trios	10	29.5	37	35.2	32.5
Medit	1	48.8	55.6	57.3	53.1
Medit	2	54.4	59.2	54.3	56.8
Medit	3	51.5	53.5	52	52.4
Medit	4	45.6	50.9	49.5	49.5
Medit	5	48	51.3	53.9	50
Medit	6	50.3	54.3	52.2	52.4
Medit	7	48.9	52.7	52.5	52.1
Medit	8	47.8	51.8	50.7	50.8

## Sheet: Precision
Impression Technique	Sample	3D Ridge (RMS)	3D Palate (RMS)	3D Vestibule (RMS)	3D Overall (RMS)
Desktop	2	7	6.8	8.7	7.4
Desktop	3	7.8	7.1	8.5	7.8		1000
Desktop	4	7.5	7.7	9.8	8.1
Desktop	5	8.4	7.2	10.1	8.6
Desktop	6	9	7.3	9.7	8.8
Desktop	7	8.7	7.5	9.6	8.7
Desktop	8	8.6	7.5	9.5	8.6
Desktop	9	8	8.2	10.2	8.6
Desktop	10	9.8	8.1	10.6	9.6
Desktop	11	9.5	7.7	9.8	9.2
Desktop	12	9.6	7.6	10.3	9.3
Desktop	13	9.5	7.7	9.9	9.2
VPS	2	28.2	24	47.4	31.7
VPS	3	44.2	50.6	53	47.8
VPS	4	27.6	25.1	45.5	31.1
VPS	5	37.7	32.1	53.4	38.3
VPS	6	56.4	55.4	54.8	55.9
VPS	7	30.2	26.3	49.7	33.8
VPS	8	40	24.1	52.6	39.5
VPS	9	32.6	36.6	44.8	35.8
VPS	10	36.6	32.1	52.4	38.4
VPS	11	57	56	58.3	57
Trios	2	25	24.2	22.4	24.2
Trios	3	27.1	26.7	28.5	27.4
Trios	4	26.6	33.2	29.3	28.8
Trios	5	25	25.2	36.2	28.5
Trios	6	27.1	18.9	29	26.2
Trios	7	32.3	26.6	34.1	31.7
Trios	8	34.4	26.9	38.9	34.3
Trios	9	30.7	30.7	34.7	31.8
Trios	10	31.8	24.8	41	33.2
Medit	2	29.6	34	25.1	29.4
Medit	3	27.9	58.4	41.5	37.9
Medit	4	43.9	50.7	32	42.5
Medit	5	35.2	28.4	34.8	34.1
Medit	6	41.5	40	35.1	39.8
Medit	7	39.8	37.4	46.3	41.3
Medit	8	22.4	16.4	27.1	22.9
Medit	9
Medit	10
